# Supplementary material for: Perception of auditory stimuli during general anesthesia and its effects on patient outcomes: a systematic review and meta-analysis
Source: Springer Nature journal article supplement (doi:10.1007/s12630-021-02015-0), 2021-05-19
Supplement: MOESM1 [file 19177540]

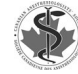

## eAPPENDIX A Literature Search

| <i>Database</i>  | <i># of refs</i> | <i>After de-duplication</i> |
|------------------|------------------|-----------------------------|
| embase.com       | 2306             | 2268                        |
| Medline Ovid     | 2342             | 839                         |
| Cochrane Central | 1211             | 594                         |
| <b>Total</b>     | <b>5859</b>      | <b>3701</b>                 |

**embase.com**

(music/de OR 'music therapy'/de OR 'sensory evoked potential'/de OR 'auditory evoked potential'/exp OR 'tape recorder'/de OR 'auditory stimulation'/de OR 'voice recorder'/de OR (music OR musical OR musicotherap\* OR ((auditor\* OR vestibul\* OR sensory) NEAR/3 (process\* OR evoke\* OR information\*)) OR tape-record\* OR (suggestion\* NEAR/3 (positive OR negative OR therapeutic OR played OR auditory)) OR melod\* OR headphone\* OR (recording NEAR/3 (story OR stories OR auditory))):ab,ti) AND (surgery/exp OR 'obstetric operation'/exp OR 'postoperative complication'/exp OR 'anesthesiological procedure'/exp OR 'perioperative nursing'/de OR 'postanesthesia nursing'/de OR 'operating room'/de OR 'recovery room'/de OR 'operating room personnel'/de OR 'surgical stress'/de OR (surger\* OR surgic\* OR peroperat\* OR perioperat\* OR preoperat\* OR postoperat\* OR operati\* OR interoperat\* OR intraoperat\* OR anesthe\* OR anaesthe\* OR perianesthe\* OR peranesthe\* OR perianaesthe\* OR peranaesthe\* OR preanasthe\* OR preanaesthe\* OR postanasthe\* OR postanaesthe\*):ab,ti OR surgery:lnk) AND ('Controlled clinical trial'/exp OR 'Crossover procedure'/de OR 'Double-blind procedure'/de OR 'Single-blind procedure'/de OR (random\* OR factorial\* OR crossover\* OR (cross NEXT/1 over\*) OR placebo\* OR ((doubl\* OR singl\*) NEXT/1 blind\*) OR assign\* OR allocat\* OR volunteer\* OR trial OR groups):ab,ti) NOT ([animals]/lim NOT [humans]/lim) NOT ([Conference Abstract]/lim) AND [English]/lim

**Medline Ovid**

(music/ OR music therapy/ OR Evoked Potentials/ OR exp Evoked Potentials, Auditory/ OR Tape Recording / OR Acoustic Stimulation / OR (music OR musical OR musicotherap\* OR ((auditor\* OR vestibul\* OR sensory) ADJ3 (process\* OR evoke\* OR information\*)) OR tape-record\* OR (suggestion\* ADJ3 (positive OR negative OR therapeutic OR played OR auditory)) OR melod\* OR headphone\* OR (recording ADJ3 (story OR stories OR auditory))):ab,ti.) AND (General Surgery/ OR exp Surgical Procedures, Operative/ OR exp Postoperative Complications/ OR exp Anesthesiology/ OR exp Perioperative Care/ OR exp Perioperative Nursing/ OR Operating Rooms/ OR Recovery Room/ OR

(surger\* OR surgic\* OR peroperat\* OR perioperat\* OR preoperat\* OR postoperat\* OR operati\* OR interoperat\* OR intraoperat\* OR anesthe\* OR anaesthe\* OR perianesthe\* OR perianesthe\* OR perianaesthe\* OR peranaesthe\* OR preanasthe\* OR preanaesthe\* OR postanasthe\* OR postanaesthe\*).ab,ti. OR surgery.fx.) AND (Controlled clinical trial/ OR Crossover procedure/ OR Double-blind procedure/ OR Single-blind procedure/ OR (random\* OR factorial\* OR crossover\* OR (cross ADJ over\*) OR placebo\* OR ((doubl\* OR singl\*) ADJ blind\*) OR assign\* OR allocat\* OR volunteer\* OR trial OR groups).ab,ti.) NOT (exp animals/ NOT humans/) NOT (news OR congres\* OR abstract\* OR book\* OR chapter\* OR dissertation abstract\*).pt. AND english.la.

## **Cochrane**

((music OR musical OR musicotherap\* OR ((auditor\* OR vestibul\* OR sensory) NEAR/3 (process\* OR evoke\* OR information\*)) OR tape NEXT record\* OR (suggestion\* NEAR/3 (positive OR negative OR therapeutic OR played OR auditory)) OR melod\* OR headphone\* OR (recording NEAR/3 (story OR stories OR auditory)))):ab,ti) AND ((surger\* OR surgic\* OR peroperat\* OR perioperat\* OR preoperat\* OR postoperat\* OR operati\* OR interoperat\* OR intraoperat\* OR anesthe\* OR anaesthe\* OR perianesthe\* OR perianesthe\* OR perianaesthe\* OR peranaesthe\* OR preanasthe\* OR preanaesthe\* OR postanasthe\* OR postanaesthe\*):ab,ti)

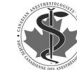

eAPPENDIX B General anesthesia regimens

| Study                         | Premedication (time before surgery)                                                                 | Anesthesia induction                                                                        | Anesthesia maintenance                                                                                                                                                                                                                                                                                                                    | Postoperative analgesia                                       | Anesthesia monitoring                          | Surgery duration                                |
|-------------------------------|-----------------------------------------------------------------------------------------------------|---------------------------------------------------------------------------------------------|-------------------------------------------------------------------------------------------------------------------------------------------------------------------------------------------------------------------------------------------------------------------------------------------------------------------------------------------|---------------------------------------------------------------|------------------------------------------------|-------------------------------------------------|
| Aceto 2003 <sup>38</sup>      | None                                                                                                | Thiopental 5 mg/kg<br>Fentanyl 3 mcg/kg<br>Vecuronium 0.08 mg/kg                            | One of four inhalational anesthesia regimens (MAC 1.0) with fentanyl 2 mcg/kg if needed                                                                                                                                                                                                                                                   | Not reported                                                  | MAC (Datex Capnomac Ultima)                    | 91 (10.5)<br>90 (12.5)<br>107 (9.0)<br>97 (9.5) |
| Aceto 2013 <sup>36</sup>      | None                                                                                                | Propofol 2 mg/kg<br>Remifentanyl 0.25 mcg/kg/min<br>Cisatracurium 0.15mg/kg                 | Sevoflurane ETAG 2.2% (1.0 MAC)<br>Remifentanyl 0.1-0.4 mcg/kg/min (MAP and HR within 20% baseline)                                                                                                                                                                                                                                       | Morphine 0.06 mg/kg<br>Acetamonphen 1000 mg                   | BIS Vista (unspecified)                        | 86.8 (28.8)<br>90.3 (25.7)                      |
| Aceto 2015 <sup>37</sup>      | None                                                                                                | Propofol 2 mg/kg<br>Fentanyl 3 mcg/kg<br>Cisatracurium 0.15 mg/kg                           | MAC Sevoflurane BIS- or hemodynamic parameter (MAP and HR within 20% baseline) guided                                                                                                                                                                                                                                                     | Acetamonphen 1000 mg<br>Tramadol 1.2 mg/kg                    | BIS Vista (unspecified), MAP and HR            | 74.4 (15.2)<br>77.6 (13.6)                      |
| Adams 1998 <sup>38</sup>      | None                                                                                                | Midazolam 0.05-0.15 mg/kg<br>Etomidate 0.1 mg/kg if needed<br>Fentanyl 10-20 mcg/kg         | Midazolam with isoflurane in O <sub>2</sub><br>Fentanyl                                                                                                                                                                                                                                                                                   | Not reported                                                  | Not reported                                   | 300 (51)                                        |
| Bejjani 2009 <sup>28</sup>    | Alprazolam 0.5 mg p.o. (30 min)                                                                     | Propofol<br>Remifentanyl<br>Cisatracurium                                                   | Propofol (target-controlled infusion)<br>Remifentanyl<br>Cisatracurium<br>Ventilation mix air/O <sub>2</sub>                                                                                                                                                                                                                              | Not reported                                                  | BIS A-2000 (V3.21);<br>Infusion<br>Toolbox ITB | 221 (45)<br>213 (52)                            |
| Bennett 1985 <sup>46</sup>    | No protocol, meperidine, morphine, glycopyrrolate, hydroxyzine, droperidol, pentobarbitone all used | Thiopental                                                                                  | N <sub>2</sub> O and either enflurane or halothane<br>Neuromuscular blocking, unspecified                                                                                                                                                                                                                                                 | Not reported                                                  | Not reported                                   | Not reported                                    |
| Block 1991 <sup>82</sup>      | Morphine 9.6 mg with or without glycopyrrolate 0.2 mg i.m. (30-60 min)                              | Thiopental<br>Non-depolarizing muscle relaxant                                              | 70% N <sub>2</sub> O in O <sub>2</sub> with isoflurane ETAG 1.0, 1.3, 1.5 MAC and fentanyl 0.75 mcg/kg;<br>or<br>70% N <sub>2</sub> O in O <sub>2</sub> with fentanyl 7.5 mcg/kg and 2.5 mcg/kg bolus (BP and HR within 15% baseline); or<br>70% N <sub>2</sub> O in O <sub>2</sub> with alfentanil 50 mcg/kg and infusion 1-3 mcg/kg/min | Codeine, meperidine, morphine, acetaminophen and/or ibuprofen | Clinical signs and ETAG                        | 128 (61)<br>121.1 (47)                          |
| Boeke 1988 <sup>83</sup>      | Lorazepam 2 mg p.o. (120 min) or thalamonal 1-2 ml i.m. (60 min)                                    | Thiopental<br>Succinylcholine<br>Atropine 0.25-0.50 mg i.m.                                 | 67%N <sub>2</sub> O in O <sub>2</sub> , enflurane if needed<br>Fentanyl<br>Pancuronium                                                                                                                                                                                                                                                    | Not reported                                                  | Clinical signs                                 | 72.5<br>60.0                                    |
| Bonebakker 1993 <sup>44</sup> | Diazepam 0.1 mg/kg, temazepam 10 mg or oxazepam 10 mg (night before)                                | Thiopental 4 mg/kg<br>Sufentanil 0.5 mcg/kg<br>Vecuronium 0.1 mg/kg<br>Atropine 0.5 mg i.m. | N <sub>2</sub> O in O <sub>2</sub> 2:1 with isoflurane 0.25-0.5% ETAG 0.2-0.4 MAC<br>Sufentanil if needed<br>Vecuronium if needed                                                                                                                                                                                                         | Not applicable                                                | Not reported                                   | Not reported                                    |

| Study                                         | Premedication<br>(time before surgery)                         | Anesthesia induction                                                                                                       | Anesthesia maintenance                                                                                                                                                                                                                | Postoperative analgesia                 | Anesthesia monitoring      | Surgery duration                                   |
|-----------------------------------------------|----------------------------------------------------------------|----------------------------------------------------------------------------------------------------------------------------|---------------------------------------------------------------------------------------------------------------------------------------------------------------------------------------------------------------------------------------|-----------------------------------------|----------------------------|----------------------------------------------------|
| Bonke 1986 <sup>66</sup>                      | Droperidol-fentanyl 1-2 ml<br>Atropine 0.25-0.5 mg<br>(60 min) | Thiopental<br>Succinylcholine                                                                                              | N <sub>2</sub> O in O <sub>2</sub><br>Fentanyl<br>Droperidol (45%)<br>Pancuronium                                                                                                                                                     | Not reported                            | Not reported               | 128 (42)<br>130 (45)<br>134 (42)                   |
| Caseley-Rondi<br>1994 <sup>25</sup>           | Diazepam 0.1 mg/kg p.o.<br>(90 min) if needed                  | Thiopental 2-5 mg/kg<br>Sufentanil 0.5 mcg/kg<br>Atracurium 0.5 mg/kg or<br>vecuronium 0.1 mg/kg                           | 70%N <sub>2</sub> O in O <sub>2</sub> , isoflurane 0.5% (ETAG<br>CO <sub>2</sub> 35-45 mm Hg)<br>Sufentanil 1 mcg/kg/h<br>Atracurium or vecuronium as needed                                                                          | PCA morphine                            | Clinical signs<br>and ETAG | Not<br>specified,<br>but differed<br>significantly |
| Dawson<br>2001 <sup>59</sup>                  | Morphine 10 mg i.m.<br>Domperidone 30 mg rect.<br>(90 min)     | Thiopental 3-5 mg/kg<br>Morphine 0.1-0.15 mg/kg<br>Vecuronium 0.1 mg/kg<br>Diclofenac 100 mg rect.                         | 66%N <sub>2</sub> O in O <sub>2</sub> (ETAG CO <sub>2</sub> 4.7-5.3 kPa)<br>and isoflurane ETAG 0.8-1.2%<br>Morphine as needed<br>Vecuronium as needed                                                                                | Diclofenac 100 mg rect.<br>PCA morphine | Clinical signs<br>and ETAG | 97 (27.9)<br>90 (18.8)                             |
| De Roode<br>1995 <sup>39</sup>                | Midazolam 0.1 mg/kg i.m.<br>(30 min)                           | Thiopental 4-5 mg/kg<br>Alfentanil 30 mcg/kg<br>Succinylcholine<br>1 mg/kg<br>Atropine 0.5 mg                              | 70%N <sub>2</sub> O in O <sub>2</sub> (ETAG CO <sub>2</sub> 3.5-4%)<br>Alfentanil 0.5-1.0 mg if needed (HR and<br>BP within 10% baseline)<br>Vecuronium 4-6 mg                                                                        | Not applicable                          | Clinical signs<br>and ETAG | Not reported                                       |
| Deeprise<br>2005 <sup>26</sup>                | None                                                           | Propofol with or without fentanyl<br>1.5 mcg/kg                                                                            | Propofol 3-9 mg/kg/h target controlled<br>infusion with 66% N <sub>2</sub> O in 33% O <sub>2</sub>                                                                                                                                    | Morphine 'as clinically<br>appropriate' | BIS A1000<br>(V2.51)       | 34 (12)<br>41 (22)                                 |
| Donker 1996 <sup>40</sup>                     | None                                                           | Induction dose of 0.2 ml/kg<br>mixture sufentanil 5 mcg/ml and<br>propofol 10 mg/ml<br>Atropine 0.5 mg<br>Atracurium 15 mg | Maintenance dose of induction mixture of<br>15ml with 0.2 ml/kg<br>Bolus 2ml of mixture if necessary (HR and<br>BP within 10% baseline)<br>ETAG CO <sub>2</sub> 35 mm Hg)                                                             | Not applicable                          | Clinical signs<br>and ETAG | 27.6 (9.0)<br>28.6 (12.2)                          |
| Eberhart<br>1988 <sup>60</sup>                | Midazolam 7.5 mg p.o.<br>(at least 120 min)                    | Droperidol 100 mcg/kg<br>Fentanyl 4 mcg/kg<br>Methohexital 1-1.5 mg/kg                                                     | N <sub>2</sub> O in O <sub>2</sub> 3:1.6 with ETAG CO <sub>2</sub> 4.4-5.0<br>Fentanyl 2 mcg/kg after skin incision<br>Fentanyl 2 mcg/kg bolus (BP and HR<br>within 30% baseline), if insufficient<br>additional droperidol 30 mcg/kg | Piritramide                             | Clinical signs<br>and ETAG | 69.9 (20.5)<br>64.9 (21.0)                         |
| Evans and<br>Richardson<br>1988 <sup>50</sup> | Not reported                                                   | Thiopental                                                                                                                 | N <sub>2</sub> O, halothane (85% patients), enflurane<br>(15% patients)                                                                                                                                                               | Not reported                            | Not reported               | 70.6 (23.9)<br>66.3 (16.8)                         |
| Ghoneim<br>2000 <sup>21</sup>                 | None                                                           | Thiopental with either:                                                                                                    | 70% N <sub>2</sub> O in 30% O <sub>2</sub> with either:                                                                                                                                                                               | Not reported                            | Clinical signs<br>and ETAG | Not reported                                       |
|                                               |                                                                | - Fentanyl 7.5 mcg/kg bolus                                                                                                | - Fentanyl bolus 2.5 mcg/kg if needed (HR<br>and BP within 15% baseline)                                                                                                                                                              |                                         |                            |                                                    |
|                                               |                                                                | - Alfentanil 50 mcg/kg                                                                                                     | - Alfentanil 1.5 mcg/kg/min infusion                                                                                                                                                                                                  |                                         |                            |                                                    |
|                                               |                                                                | - Fentanyl 1 mcg/kg                                                                                                        | - Isoflurane ETAG 0.3%, fentanyl<br>- Isoflurane ETAG 0.7%, fentanyl                                                                                                                                                                  |                                         |                            |                                                    |

| Study                        | Premedication (time before surgery)                                                                      | Anesthesia induction                                                                          | Anesthesia maintenance                                                                                                                                                           | Postoperative analgesia                                                            | Anesthesia monitoring     | Surgery duration                 |
|------------------------------|----------------------------------------------------------------------------------------------------------|-----------------------------------------------------------------------------------------------|----------------------------------------------------------------------------------------------------------------------------------------------------------------------------------|------------------------------------------------------------------------------------|---------------------------|----------------------------------|
| Hughes 1994 <sup>48</sup>    | Not specified, but received by majority                                                                  | Propofol, thiopental or etomidate                                                             | Inhalational volatile drug with opioid and positive pressure ventilation                                                                                                         | Not reported                                                                       | Not reported              | Not reported                     |
| Ikedo 2007 <sup>69</sup>     | Not reported                                                                                             | Not reported                                                                                  | Not reported                                                                                                                                                                     | Morphine                                                                           | Not reported              | 228 (78)<br>210 (66)<br>222 (60) |
| Jansen 1991 <sup>47</sup>    | Lorazepam 1.0 mg p.o. (night before) and/or midazolam 2.5 mg i.m. (30 min) if necessary                  | Thiopental 4 mg/kg<br>Fentanyl 0.005 mg/kg<br>Pancuronium 0.1 mg/kg or vecuronium 0.1 mg/kg   | N <sub>2</sub> O in O <sub>2</sub> 2:1 with enflurane ETAG 0.2-0.4 MAC, ETAG CO <sub>2</sub> 4.3-4.5%<br>Incremental fentanyl (HR and BP)<br>Pancuronium or vecuronium if needed | Not reported                                                                       | Not reported              | Not reported                     |
| Jayaraman 2006 <sup>62</sup> | Alprazolam 0.5 mg p.o. (night before)<br>Metoclopramide 10 mg and ranitidine 150 mg (morning of surgery) | Propofol 1 mg/kg<br>Fentanyl 1 mg/kg<br>Vecuronium 0.1 mg/kg                                  | 70% N <sub>2</sub> O in O <sub>2</sub> with sevoflurane ETAG 0.6-1.0%                                                                                                            | Diclofenac                                                                         | Clinical signs and ETAG   | 79.1 (43.6)<br>82.6 (36.6)       |
| Jelicic 1992 <sup>41</sup>   | None                                                                                                     | Thiopental 4-5 mg/kg<br>Alfentanil 20 mcg/kg<br>Succinylcholine 1 mg/kg<br>Atropine 0.5 mg    | 65% N <sub>2</sub> O in O <sub>2</sub> (ETAG CO <sub>2</sub> 3.5-4.0%)<br>Alfentanil 0.5-1.0 mg (HR and BP within 10% baseline)<br>Vecuronium 4-6 mg, 1mg every 20 min           | Not applicable                                                                     | Clinical signs and ETAG   | Not reported                     |
| Jelicic 1993 <sup>42</sup>   | Morphine 10-15 mg and cyclizine 50 mg i.m. (45 min)                                                      | Thiopental                                                                                    | N <sub>2</sub> O and enflurane in 34% O <sub>2</sub> with ETAG enflurane 1.1%                                                                                                    | Morphine 10 mg and cyclizine 50 mg as needed                                       | Clinical signs and ETAG   | Not reported                     |
| Kahloul 2017 <sup>51</sup>   | Not reported                                                                                             | Propofol<br>Fentanyl 3 mcg/kg<br>Cisatracurium 0.15 mg/kg                                     | Isoflurane with 50% O <sub>2</sub> /50% air<br>Fentanyl as needed<br>Cisatracurium as needed                                                                                     | Nefopam                                                                            | Clinical signs            | 79.1 (43.6)<br>82.6 (36.6)       |
| Kerssens 2001 <sup>45</sup>  | None                                                                                                     | Propofol 6 mcg/ml target-controlled infusion<br>Alfentanil 0.02 mg/kg<br>Vecuronium 0.1 mg/kg | BIS-guided propofol target controlled infusion<br>Ventilation mixture 40% air/60%O <sub>2</sub>                                                                                  | Not applicable                                                                     | BIS A1000 (V3.2)          | 38 (28)<br>34 (23)               |
| Kerssens 2009 <sup>22</sup>  | Fentanyl 50-100 mcg if needed during epidural or PCA placement                                           | Propofol 2 mg/kg<br>Fentanyl 3 mcg/kg<br>Vecuronium 0.1 mg/kg                                 | Sevoflurane in O <sub>2</sub><br>Fentanyl 50-100 mcg<br>Esmolol 0.5 mg/kg<br>Phenylephrine 100 mcg if needed                                                                     | Epidural (meperidine / bupivacaine or morphine) or PCA (hydromorphone or morphine) | ETAG and/or BIS XP (V3.4) | 126 (51)<br>112 (48)             |
| Kliempt 1999 <sup>84</sup>   | None                                                                                                     | Propofol 2.5 mg/kg                                                                            | 66%N <sub>2</sub> O in 33%O <sub>2</sub> with isoflurane ETAG MAC 1.2%<br>Fentanyl (BP and HR within 20% baseline)                                                               | Not applicable                                                                     | Clinical signs and ETAG   | 53 (42)<br>63 (41)<br>48 (28)    |

| Study                                   | Premedication<br>(time before surgery)                                       | Anesthesia induction                                                                                                 | Anesthesia maintenance                                                                                                                                               | Postoperative analgesia                                              | Anesthesia monitoring                      | Surgery duration              |
|-----------------------------------------|------------------------------------------------------------------------------|----------------------------------------------------------------------------------------------------------------------|----------------------------------------------------------------------------------------------------------------------------------------------------------------------|----------------------------------------------------------------------|--------------------------------------------|-------------------------------|
| Lebovits 1999 <sup>63</sup>             | None                                                                         | Propofol 1-2 mg/kg<br>Succinylcholine 1 mg/kg with tubocurarine 3 mg or vecuronium 0.1 mg/kg or atracurium 0.5 mg/kg | Propofol 75-200 mcg/kg/min with 65% N <sub>2</sub> O in 35% O <sub>2</sub><br>Isoflurane < 0.6% if needed<br>Fentanyl 5 mcg/kg<br>Vecuronium 0.01 mg/kg              | Fentanyl 1-2 mcg/kg<br>Local infiltration with bupivacaine 0.25-0.5% | Not reported                               | 77.6<br>75.5                  |
| Lequeux 2014 <sup>29</sup>              | Midazolam 0.1 mg/kg p.o. (before arrival in operating room)                  | Propofol<br>Remifentanyl                                                                                             | BIS-guided propofol target controlled infusion with remifentanyl effect-site either same or double                                                                   | Not applicable                                                       | BIS XP (unspecified)                       | 54 (36)<br>52 (48)<br>69 (40) |
| Lewis 2004 <sup>85</sup>                | Midazolam 2 mg (entering operating room)                                     | Propofol<br>Fentanyl 100 mcg (lumbar) or 250 mcg (bariatric)<br>Vecuronium 8-10 mg                                   | Isoflurane with N <sub>2</sub> O (lumbar) or without N <sub>2</sub> O (bariatric), and O <sub>2</sub><br>Fentanyl 25 mcg (SBP within 20% and HR within 15% baseline) | Not applicable                                                       | BIS (unspecified)                          | 150 (70)<br>156 (58)          |
| Liu 1992 <sup>52</sup>                  | Papaveretum 0.15 mg/kg and prochlorperazine 0.18 mg/kg i.m. (before surgery) | Thiopental 5 mg/kg<br>Vecuronium 0.1 mg/kg                                                                           | 66% N <sub>2</sub> O and 1-1.5% enflurane in O <sub>2</sub><br>Papaveretum 0.1 mg/kg if needed                                                                       | Papaveretum i.m.<br>Coproxamol p.o.                                  | Not reported                               | 81.4 (16.2)<br>75.6 (14.3)    |
| Maroof 1997 <sup>64</sup>               | Promethazine 0.5 mg/kg and buprenorphine 0.04 mg/kg i.m. (before surgery)    | Thiopental 5 mg/kg<br>Vecuronium 0.1 mg/kg                                                                           | Halothane 1-2% in 60%N <sub>2</sub> O and 40%O <sub>2</sub>                                                                                                          | Diclofenac 75 mg i.m.                                                | Clinical signs and ETAG                    | 126 (13.7)<br>118 (15.3)      |
| McLintock 1990 <sup>53</sup>            | Midazolam (unspecified)                                                      | Thiopental 4 mg/kg<br>Morphine 0.15 mg/kg<br>Vecuronium                                                              | 66% N <sub>2</sub> O with O <sub>2</sub> , enflurane 0.8-1.5%                                                                                                        | PCA morphine                                                         | Not reported                               | Not reported                  |
| Melzack 1996 <sup>32</sup>              | None                                                                         | Thiopental 5 mg/kg<br>Fentanyl 100 mg<br>Vecuronium 0.1 mg/kg                                                        | Isoflurane 1-2% with 100%O <sub>2</sub><br>Vecuronium as needed                                                                                                      | Opioid as needed                                                     | Not reported                               | 79.5 (21.1)<br>70.7 (20.4)    |
| Migneault 2004 <sup>61</sup>            | None                                                                         | Propofol 1.5-2 mg/kg<br>Fentanyl 3 mcg/kg<br>Rocuronium 0.6 mg/kg                                                    | BIS-guided isoflurane ETAG 0.3-1.5% and 50% O <sub>2</sub> /50%air<br>Fentanyl 0.5-1 mcg/kg (BP and HR within 20% baseline)<br>Rocuronium 10-20 mg                   | Morphine 3-5 mg bolus followed by PCA morphine                       | BIS (unspecified), clinical signs and ETAG | 106 (18)<br>125 (45)          |
| Millar and Watkinson 1983 <sup>50</sup> | Papaveretum or perphenazine with scopolamine, or pethidine and promethazine  | Thiopental or althesin                                                                                               | N <sub>2</sub> O 66% in O <sub>2</sub> with or without halothane 0.25-1.0%                                                                                           | Not reported                                                         | Isolated forearm technique                 | Not reported                  |

| Study                              | Premedication (time before surgery)                                  | Anesthesia induction                                                                                        | Anesthesia maintenance                                                                                                                                                              | Postoperative analgesia                                                   | Anesthesia monitoring      | Surgery duration                     |
|------------------------------------|----------------------------------------------------------------------|-------------------------------------------------------------------------------------------------------------|-------------------------------------------------------------------------------------------------------------------------------------------------------------------------------------|---------------------------------------------------------------------------|----------------------------|--------------------------------------|
| Myles 1996 <sup>49</sup>           | Benzodiazepine, opioid or other unspecified (60%)                    | Thiopental or propofol                                                                                      | Isoflurane or enflurane<br>Neuromuscular blocker (60%)                                                                                                                              | Not reported                                                              | Not reported               | 56 (46)<br>50 (41)                   |
| Nilsson 2001 <sup>54</sup>         | Pethidine 50 mg and dixyrazine 10 mg i.m. (unspecified)              | Propofol 1-2 mg/kg<br>Fentanyl 2-3 mcg/kg<br>Rocuronium 0.6 mg/kg                                           | 70% N <sub>2</sub> O in O <sub>2</sub> and isoflurane ETAG ≥ 0.7                                                                                                                    | PCA ketobemidone                                                          | Clinical signs and ETAG    | 96 (31.7)<br>90 (29.1)<br>100 (31.7) |
| Nilsson 2003 <sup>55</sup>         | None                                                                 | Propofol 1-2 mg/kg<br>Fentanyl 1-2 mcg/kg                                                                   | 70% N <sub>2</sub> O in O <sub>2</sub> with sevoflurane ETAG ≥ 1.2 MAC                                                                                                              | Diclofenac 100 mg rect.<br>Morphine 1-3 mg                                | Clinical signs and ETAG    | 23 (8.4)<br>24 (7.2)                 |
| Nilsson 2005 <sup>56</sup>         | None                                                                 | Propofol 1-2 mg/kg<br>Fentanyl 1-2 mcg/kg                                                                   | 70% N <sub>2</sub> O in O <sub>2</sub> with sevoflurane ETAG ≥ 1.2 MAC                                                                                                              | Diclofenac 100 mg rect.<br>Morphine 1-3 mg                                | Clinical signs and ETAG    | 23 (8.8)<br>23 (4.9)                 |
| Oddby-Muhrbeck 1995 <sup>67</sup>  | Midazolam 4-5 mg i.m. (30-45 min)                                    | Thiopental<br>Fentanyl 2 mcg/kg<br>Succinylcholine                                                          | O <sub>2</sub> to N <sub>2</sub> O 1:2 with isoflurane                                                                                                                              | Morphine or ketobemidone                                                  | Clinical signs             | 62 (16)<br>69 (22)                   |
| Parker 1994 <sup>31</sup>          | Diazepam 10 mg p.o. (90-360 min)                                     | Thiopental 5 mg/kg<br>Fentanyl 3 mcg/kg<br>Midazolam 0.07 mg/kg<br>Atracurium 0.6 mg/kg                     | 70% N <sub>2</sub> O in O <sub>2</sub> , ETAG CO <sub>2</sub> 4-4.7 kPa<br>Fentanyl 50 mcg if needed<br>Atracurium if needed                                                        | Not reported                                                              | Clinical signs and ETAG    | 57.9 (32.1)<br>63.4 (30.5)           |
| Kalyani 2015 <sup>86</sup>         | Midazolam 0.03 mg/kg (unspecified)                                   | Propofol (eyelash reflex loss)<br>Fentanyl 1.5 mcg/kg<br>Vecuronium 0.1 mg/kg                               | BIS-guided isoflurane ETAG 0.3-1.5%<br>Mixture 50 %O <sub>2</sub> in air<br>Fentanyl 1 mcg/kg if needed                                                                             | Diclofenac in 100 ml normal saline                                        | BIS (unspecified)          | 125 (20)<br>130 (34)                 |
| Renna 2000 <sup>27</sup>           | Ketorolac 10 mg (30 min)                                             | Sevoflurane in O <sub>2</sub> (ETAG 1.2, 1.5 or 2.0% randomized)                                            | Sevoflurane in O <sub>2</sub> (ETAG 1.2, 1.5 or 2.0% randomized) during auditory intervention followed by 'surgical anesthesia'                                                     | Not applicable                                                            | BIS A1000 (V2.51), ETAG    | Not reported                         |
| Reza 2007 <sup>57</sup>            | None                                                                 | Thiopental 3-5 mg/kg<br>Succinylcholine 1 mg/kg                                                             | 50% N <sub>2</sub> O in O <sub>2</sub> with halothane 0.8 MAC<br>Midazolam 1-2 mg<br>Morphine 5-7 mg                                                                                | Morphine                                                                  | Not reported               | 23.7 (6.4)<br>21.6 (5.2)             |
| Russel and Wang 2001 <sup>33</sup> | Temazepam 20 mg p.o. (60-120 min)<br>Epidural 0.5% bupivacaine L2-L3 | Propofol 2-2.5 mg/kg target-controlled infusion<br>Alfentanil 10-12.5 mcg/kg<br>Succinylcholine 1-1.5 mg/kg | Propofol 10-8-6-4 mg/kg/h stepdown with incremental alfentanil (1 mg:5 mcg)<br>Atracurium 0.2-0.4 mg/kg<br>Ventilation mixture air 35-40%O <sub>2</sub> (ETAG CO <sub>2</sub> 4-5%) | Epidural topped up with 10 mL of 0.125% bupivacaine with 3 mg diamorphine | Isolated forearm technique | 78.9 (35.5)<br>109.3 (58.8)          |
| Simcock 2008 <sup>23</sup>         | Not reported                                                         | Spinal-epidural anesthesia with propofol sedation                                                           | Spinal-epidural anesthesia with propofol sedation                                                                                                                                   | Ketorolac, oxytocin, oxycodone                                            | Not reported               | Not reported                         |

| Study                           | Premedication<br>(time before surgery)                                                                          | Anesthesia induction                                                                                                          | Anesthesia maintenance                                                                                                                              | Postoperative analgesia                                     | Anesthesia monitoring      | Surgery duration        |
|---------------------------------|-----------------------------------------------------------------------------------------------------------------|-------------------------------------------------------------------------------------------------------------------------------|-----------------------------------------------------------------------------------------------------------------------------------------------------|-------------------------------------------------------------|----------------------------|-------------------------|
| Szmuk 2008 <sup>58</sup>        | None                                                                                                            | Sevoflurane 6% ETAG, with 100% O <sub>2</sub><br>Fentanyl 2 mcg/kg<br>Rocuronium 0.6 mg/kg                                    | 50% N <sub>2</sub> O in O <sub>2</sub> with BIS-guided sevoflurane, ETAG CO <sub>2</sub> 30-35 mm Hg<br>Fentanyl 1 mcg/kg/h<br>Rocuronium if needed | Meperidine 20 mg and dipyrone 2000 mg bolus if needed       | BIS AS3 (unspecified)      | 83 (37)<br>74 (28)      |
| Tsuchiya 2003 <sup>87</sup>     | Midazolam 0.08 mg/kg i.m. (60 min)<br>Epidural catheter T9-10                                                   | Propofol 3-4 mg/kg<br>Fentanyl 4 mcg/kg<br>Vecuronium 0.15 mg/kg<br>Epidural 1.5% lidocaine 5ml, fentanyl 0.1 mg loading dose | Propofol 5-8 mg/kg<br>100% O <sub>2</sub> and ETAG CO <sub>2</sub> 35-38 mm Hg<br>Continuous epidural infusion of 1.5% lidocaine 5 ml/h             | Epidural lidocaine infusion until leaving PACU after 20 min | BIS (unspecified)          | Not specified, but same |
| Westmoreland 1993 <sup>34</sup> | Ranitidine 150 mg and metoclopramide 10 mg p.o. (morning of surgery);<br>Randomized to 2 mg midazolam or saline | Propofol 2.5 mg/kg<br>Fentanyl 3 mcg/kg                                                                                       | Isoflurane 1.3 MAC until incision, then isoflurane 1.0 MAC in 70% N <sub>2</sub> O<br>Fentanyl 50-100 mcg increments                                | Not reported                                                | Not reported               | Not reported            |
| Williams 1994 <sup>65</sup>     | Papaveretum 10-20 mg and hyoscine 0.2-0.4 mg i.m. (unspecified)                                                 | Thiopental 4-6 mg/kg<br>Succinylcholine 1 mg/kg<br>Vecuronium 0.1 mg/kg                                                       | 66% N <sub>2</sub> O in 33% O <sub>2</sub> with isoflurane 1% (ETAG CO <sub>2</sub> 4-4.7 kPa)<br>Vecuronium as needed                              | Papaveretum 10-20 mg, diclofenac 100 mg rect.               | Clinical signs and ETAG    | Not specified, but same |
| Zhang 2005 <sup>68</sup>        | Spinal epidural L2-3 tetracaine 0.55% 1.5-2.0 mL followed by lidocaine 2% 4-6 mL                                | Propofol 0.5 mg/kg<br>Fentanyl 1 mcg/kg                                                                                       | Propofol 0.2-1.2 mcg/ml every 10 min target controlled infusion, OOA/S guided                                                                       | Not reported                                                | OOA/S<br>BIS HXD-I (V3.31) | 86 (28)<br>85 (28)      |

eAppendix B. Perioperative anesthesia regimen of studies investigating intraoperative auditory interventions during general anesthesia on memory formation and patient outcome. All medication are either intravenously administered, except in the case of inhalational anesthesia administration or if otherwise stated (p.o. = per os, oral administration, i.m. = intramuscular administration).

BIS = Bispectral index; BP = Blood pressure; Clinical signs = Monitoring with standard equipment (electrocardiogram, non-invasive blood pressure, pulse oximetry); CO<sub>2</sub> = carbon dioxide; ETAG = End-tidal anesthesia gas concentration; HR = Heart rate; kg = kilogram; kPa = kilopascal; MAC = Minimum alveolar concentration; MAP = Mean arterial pressure; mcg = microgram; mg = milligram; ml = milliliter; mm = millimeter; Not applicable = No postoperative medication was given before memory formation testing; OOA/S = Observer Assessment of Alertness/Sedation Scale; O<sub>2</sub> = oxygen; PCA = patient-controlled analgesia; Surgery duration = Surgery duration in minutes, reported as mean (standard deviation) in minutes. Group 1 is noted first, followed by group 2 and other groups if applicable



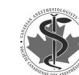

## eAPPENDIX C Risk of Bias Assessment

| Study                                   | Method of randomization               | Allocation concealment | Blinding participants | Blinding personnel | Blinding assessors | Incomplete outcome | Selective reporting | Other bias addressed   |
|-----------------------------------------|---------------------------------------|------------------------|-----------------------|--------------------|--------------------|--------------------|---------------------|------------------------|
| Aceto 2003 <sup>38</sup>                | Yes, premade randomization tables     | Yes                    | Yes                   | Yes                | Yes                | Yes                | Unclear             | Yes                    |
| Aceto 2013 <sup>36</sup>                | Yes, computerized randomization list  | Yes                    | Yes                   | Yes                | Yes                | Yes                | Unclear             | Yes                    |
| Aceto 2015 <sup>37</sup>                | Yes, computer generated randomization | Yes                    | Yes                   | Yes                | Yes                | Yes                | Unclear             | Yes                    |
| Adams 1998 <sup>35</sup>                | Unclear, randomly assigned            | Unclear                | Yes                   | Yes                | Yes                | Unclear            | Unclear             | Unclear (OR)           |
| Bejjani 2009 <sup>28</sup>              | Yes, random number generator          | Yes                    | Yes                   | Yes                | Yes                | Unclear            | Unclear             | Yes                    |
| Bennett 1985 <sup>46</sup>              | Unclear, randomly assigned            | Unclear                | Yes                   | Yes                | Yes                | Yes                | Unclear             | Unclear (OR)           |
| Block 1991 <sup>82</sup>                | Unclear, premade randomization tables | Unclear                | Yes                   | Yes                | Yes                | Yes                | Unclear             | Yes                    |
| Boeke 1988 <sup>83</sup>                | Unclear, randomly assigned            | Unclear                | Yes                   | Yes                | Yes                | Yes                | Unclear             | Unclear (BMI)          |
| Bonebakker 1993 <sup>44</sup>           | Yes, premade randomization            | Yes                    | Yes                   | Yes                | Yes                | Unclear            | Unclear             | Unclear (BMI)          |
| Bonke 1986 <sup>66</sup>                | Unclear, randomly assigned            | Unclear                | Yes                   | Yes                | Yes                | Yes                | Unclear             | Unclear (BMI)          |
| Caseley-Rondi 1994 <sup>25</sup>        | Unclear, randomly assigned            | Unclear                | Yes                   | Yes                | Yes                | Unclear            | Unclear             | No (OR)                |
| Dawson 2001 <sup>59</sup>               | Yes, table of random numbers          | Yes                    | Yes                   | Yes                | Yes                | Yes                | Unclear             | Yes                    |
| Deepröse 2005 <sup>26</sup>             | Unclear, randomly assigned            | Unclear                | Yes                   | Yes                | Yes                | Yes                | Unclear             | Unclear (Age)          |
| De Roode 1995 <sup>39</sup>             | Unclear, randomly assigned            | Unclear                | Yes                   | Yes                | Yes                | Yes                | Unclear             | Unclear (OR)           |
| Donker 1996 <sup>40</sup>               | Unclear, randomly assigned            | Unclear                | Yes                   | Yes                | Yes                | Unclear            | Unclear             | Unclear (BMI)          |
| Eberhart 1998 <sup>60</sup>             | Unclear, but stratified randomization | Unclear                | Yes                   | Yes                | Yes                | Unclear            | Unclear             | Yes                    |
| Evans and Richardson 1988 <sup>50</sup> | Unclear, randomly assigned            | Unclear                | Yes                   | Yes                | Yes                | Yes                | Unclear             | Unclear (BMI)          |
| Ghoneim 2000 <sup>21</sup>              | Yes, premade randomization tables     | Yes                    | Yes                   | Yes                | Yes                | Yes                | Unclear             | Unclear (OR)           |
| Hughes 1994 <sup>48</sup>               | Unclear, randomly assigned            | Unclear                | Yes                   | Yes                | Yes                | Yes                | Unclear             | Unclear (OR)           |
| Ikedo 2007 <sup>69</sup>                | Yes, computer-generated randomization | Yes                    | Yes                   | Yes                | Yes                | Unclear            | Unclear             | No (SS)                |
| Jansen 1991 <sup>47</sup>               | Unclear, randomly assigned            | Unclear                | Yes                   | Yes                | Yes                | Unclear            | Unclear             | Unclear (BMI)          |
| Jayaraman 2006 <sup>62</sup>            | Unclear, randomly assigned            | Unclear                | Yes                   | Yes                | Yes                | Unclear            | Unclear             | Unclear (age, BMI, OR) |
| Jelicic 1992 <sup>41</sup>              | Unclear, randomly assigned            | Unclear                | Yes                   | Yes                | Yes                | Yes                | Unclear             | Unclear (BMI)          |
| Jelicic 1993 <sup>42</sup>              | Unclear, randomly assigned            | Unclear                | Yes                   | Yes                | Yes                | Unclear            | Unclear             | Unclear (BMI)          |
| Kahloul 2017 <sup>51</sup>              | No, odds and even days                | No                     | Yes                   | Yes                | Yes                | Yes                | Unclear             | Yes                    |
| Kerssens 2001 <sup>45</sup>             | Unclear, randomly assigned            | Unclear                | Yes                   | Yes                | Yes                | Unclear            | Unclear             | Yes                    |
| Kerssens 2009 <sup>22</sup>             | Yes, computer-generated list          | Yes                    | Yes                   | Yes                | Yes                | Unclear            | Unclear             | Yes                    |
| Kliempt 1999 <sup>84</sup>              | Yes, computer-generated randomization | Yes                    | Yes                   | Yes                | Yes                | Yes                | Unclear             | Yes                    |
| Lebovits 1999 <sup>63</sup>             | Yes, random numbers table             | Yes                    | Yes                   | Yes                | Yes                | Unclear            | Unclear             | Yes                    |
| Lequeux 2014 <sup>29</sup>              | Unclear, randomly assigned            | Unclear                | Yes                   | Yes                | Yes                | Yes                | Unclear             | Yes                    |

| Study                                   | Method of randomization               | Allocation concealment | Blinding participants | Blinding personnel | Blinding assessors | Incomplete outcome | Selective reporting | Other bias addressed   |
|-----------------------------------------|---------------------------------------|------------------------|-----------------------|--------------------|--------------------|--------------------|---------------------|------------------------|
| Lewis 2004 <sup>85</sup>                | Predetermined randomization list      | Yes                    | Yes                   | Yes                | Yes                | Yes                | Unclear             | Unclear (Age)          |
| Liu 1992 <sup>52</sup>                  | Unclear, randomly assigned            | Unclear                | Yes                   | Yes                | Yes                | Yes                | Unclear             | Yes                    |
| Maroof 1997 <sup>64</sup>               | Unclear, randomly assigned            | Unclear                | Yes                   | Yes                | Yes                | Unclear            | Unclear             | Yes                    |
| McLintock 1990 <sup>53</sup>            | Unclear, randomly assigned            | Unclear                | Yes                   | Yes                | Yes                | Yes                | Unclear             | Yes                    |
| Melzack 1996 <sup>32</sup>              | Yes, random number list               | Yes                    | Yes                   | Yes                | Yes                | Unclear            | Unclear             | Yes                    |
| Migneault 2004 <sup>61</sup>            | Unclear, randomly assigned            | Unclear                | Yes                   | Yes                | Yes                | Unclear            | Unclear             | Yes                    |
| Millar and Watkinson 1983 <sup>30</sup> | Unclear, randomly assigned            | Unclear                | Yes                   | Yes                | Yes                | Unclear            | Unclear             | Unclear (OR)           |
| Myles 1996 <sup>49</sup>                | Yes, random number list               | Yes                    | Yes                   | Yes                | Yes                | Yes                | Unclear             | Unclear (BMI)          |
| Nilsson 2001 <sup>54</sup>              | Yes, computer-generated randomization | Yes                    | Yes                   | Yes                | Yes                | Yes                | Unclear             | Yes                    |
| Nilsson 2003 <sup>55</sup>              | Yes, computer-generated randomization | Yes                    | Yes                   | Yes                | Yes                | Yes                | Unclear             | Yes                    |
| Nilsson 2005 <sup>56</sup>              | Yes, computer-generated randomization | Yes                    | Yes                   | Yes                | Yes                | Yes                | Unclear             | Yes                    |
| Oddby-Muhrbeck 1995 <sup>67</sup>       | Unclear, randomly assigned            | Unclear                | Yes                   | Yes                | Yes                | Yes                | Unclear             | Yes                    |
| Parker 1994 <sup>31</sup>               | Yes, sealed envelopes method          | Yes                    | Yes                   | Yes                | Yes                | Yes                | Unclear             | Yes                    |
| Kalyani 2015 <sup>86</sup>              | Yes, computer-generated randomization | Yes                    | Yes                   | Yes                | Yes                | Yes                | Unclear             | Yes                    |
| Renna 2000 <sup>27</sup>                | Yes, drawing code from a hat          | Yes                    | Yes                   | Yes                | Yes                | Yes                | Unclear             | Unclear (OR)           |
| Reza 2007 <sup>57</sup>                 | Yes, computer-generated randomization | Yes                    | Yes                   | Yes                | Yes                | Yes                | Unclear             | Yes                    |
| Russel and Wang 2001 <sup>33</sup>      | Yes, sealed envelopes method          | Yes                    | Yes                   | Yes                | Yes                | Yes                | Unclear             | No (age, OR)           |
| Simcock 2008 <sup>23</sup>              | Yes, sealed envelopes method          | Yes                    | Yes                   | Yes                | Yes                | Yes                | Unclear             | Yes                    |
| Szmuk 2008 <sup>58</sup>                | Yes, computer-generated randomization | Yes                    | Yes                   | Yes                | Yes                | Yes                | Unclear             | Yes                    |
| Tsuchiya 2003 <sup>87</sup>             | Unclear, randomly assigned            | Unclear                | Yes                   | Yes                | Yes                | Unclear            | Unclear             | Unclear (age)          |
| Westmoreland 1993 <sup>34</sup>         | Unclear, randomly assigned            | Unclear                | Yes                   | Yes                | Yes                | Unclear            | Unclear             | Unclear (age, BMI, OR) |
| Williams 1994 <sup>65</sup>             | Unclear, randomly assigned            | Unclear                | Yes                   | Yes                | Yes                | Unclear            | Unclear             | Unclear (age, BMI)     |
| Zhang 2005 <sup>68</sup>                | Yes, computer-generated randomization | Yes                    | Yes                   | Yes                | Yes                | Yes                | Unclear             | Yes                    |

eAppendix C. Detailed risk of bias summary.

Yes = Yes, low risk of bias; No = No, high risk of bias; Unclear = Unclear risk of bias; Other bias = Potential bias factors include group sex, age, BMI or weight, and duration of surgery; OR = Surgery duration not reported; BMI = BMI or weight not reported; Age = age not reported; SS = Sample size not reached
